# Supplementary material for: GNP confinement at the interface of cationic reverse micelles: influence in improving the lipase activity
Source: Royal Society of Chemistry journal article supplement (doi:10.1039/c2ra21237d), 2012-01-01
Supplement: c2ra21237d.pdf [file c2ra21237d.pdf]

## Electronic Supplementary Information

### **GNP Confinement at the Interface of Cationic Reverse Micelle: Influence in Improving the Lipase Activity**

Moumita Ghosh, Subhabrata Maiti, Sayanti Brahmachari and Prasanta Kumar Das <sup>□\*</sup>[a]

*Department of Biological Chemistry, Indian Association for the Cultivation of Science,  
Jadavpur, Kolkata – 700 032, India.*

\*To whom correspondence should be addressed. Fax: +(91)-33-24732805, E-mail:  
bcpkd@iacs.res.in

**Table S1** Isosbestic point ( $\lambda_{\text{iso}}$ ) and molar extinction co-efficient ( $\epsilon$ ) of *p*-nitrophenol/*p*-nitrophenolate couple in different GNP-doped reverse micelles.

| System                             | [Au]<br>( $\mu\text{M}$ ) | $\lambda_{\text{iso}}$<br>(nm) | $\epsilon$ values<br>( $\text{M}^{-1}\text{cm}^{-1}$ ) |
|------------------------------------|---------------------------|--------------------------------|--------------------------------------------------------|
| GNP doped CTAB<br>reverse micelle  | 0                         | 340                            | 4370                                                   |
|                                    | 10                        | 342                            | 4100                                                   |
| GNP doped CTEAB<br>reverse micelle | 0                         | 340                            | 4460                                                   |
|                                    | 10                        | 342                            | 4360                                                   |
| GNP doped CTPAB<br>reverse micelle | 0                         | 338                            | 4558                                                   |
|                                    | 10                        | 342                            | 4344                                                   |

**Table S2** The second-order rate constant  $k_2$  ( $\text{cm}^3\text{g}^{-1}\text{s}^{-1}$ ) of the lipase-catalyzed hydrolysis of *p*-nitrophenyl-*n*-hexanoate in water + 4%EtOH in the presence of GNP<sub>508</sub>, C<sub>12</sub>-thiol and C<sub>6</sub>-dithiol at varying concentrations of thiol.

| Systems                        | Conc of GNP <sub>508</sub> ( $\mu\text{M}$ ) | Conc of thiol/dithiol ( $\mu\text{M}$ ) | $k_2$ ( $\text{cm}^3\text{g}^{-1}\text{s}^{-1}$ ) $\times 10^{-5}$ (C <sub>12</sub> -thiol) | $k_2$ ( $\text{cm}^3\text{g}^{-1}\text{s}^{-1}$ ) $\times 10^{-5}$ (C <sub>6</sub> -dithiol) |
|--------------------------------|----------------------------------------------|-----------------------------------------|---------------------------------------------------------------------------------------------|----------------------------------------------------------------------------------------------|
| Water+4%EtOH                   | 0                                            | 0                                       | 2.5                                                                                         | 2.5                                                                                          |
| Water+4%EtOH+GNP               | 10                                           | 0                                       | 1.8                                                                                         | 1.8                                                                                          |
| Water+4%EtOH+thiol/dithiol     | 0                                            | 10                                      | 2.3                                                                                         | 2.4                                                                                          |
| Water+4%EtOH+GNP+thiol/dithiol | 10                                           | 10                                      | 1.8                                                                                         | 2.0                                                                                          |
| ”                              | 10                                           | 100                                     | 2.4                                                                                         | 2.5                                                                                          |
| ”                              | 10                                           | 200                                     | 2.4                                                                                         | 2.6                                                                                          |
| ”                              | 10                                           | 400                                     | 2.8                                                                                         | 2.9                                                                                          |
| ”                              | 10                                           | 600                                     | 2.9                                                                                         | 3.0                                                                                          |

**Table S3** The second-order rate constant  $k_2$  ( $\text{cm}^3 \text{g}^{-1} \text{s}^{-1}$ ) of the lipase-catalyzed hydrolysis of *p*-nitrophenyl-*n*-octanoate in CTAB, CTEAB and CTPAB reverse micelles in the presence of only GNPs of varying size at  $z=4.8$ ,  $W_0=48$ .

| Surfactant | Without GNP and thiol | In presence of GNP (without thiol) |                    |                    |
|------------|-----------------------|------------------------------------|--------------------|--------------------|
|            |                       | GNP <sub>508</sub>                 | GNP <sub>515</sub> | GNP <sub>536</sub> |
| CTAB       | 433±7                 | 482±6                              | 500±7              | 516±8              |
| CTEAB      | 582±7                 | 648±7                              | 661±6              | 689±9              |
| CTPAB      | 790±7                 | 870±7                              | 928±8              | 984±9              |

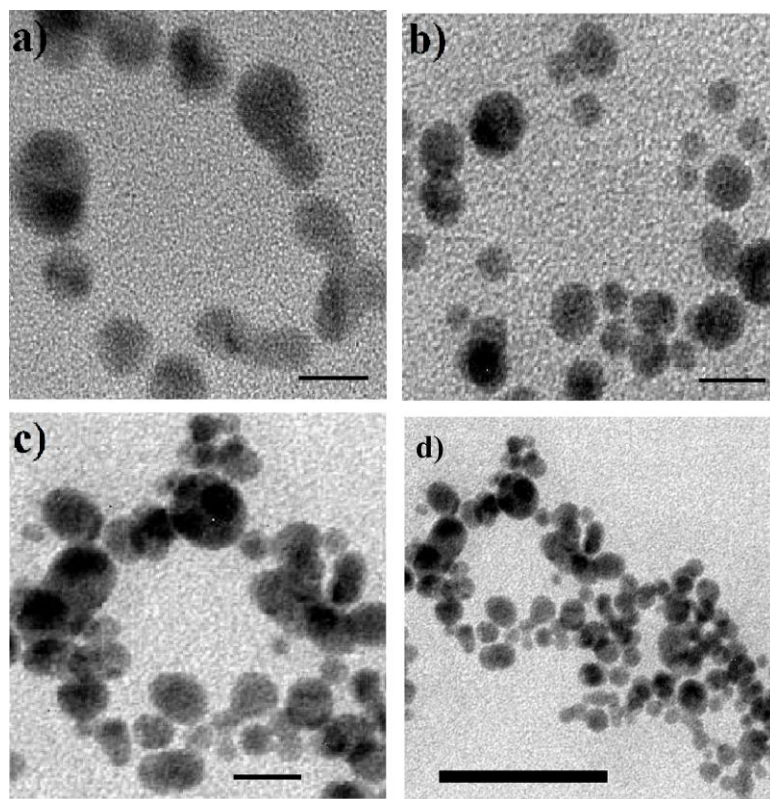

**Fig. S1** TEM images of GNP<sub>508</sub> in CTAB reverse micelles in presence of a,b) C<sub>12</sub>-thiol, c,d) C<sub>6</sub>-dithiol. Scale bar of a, b, c = 5nm, scale bar of d = 50nm.

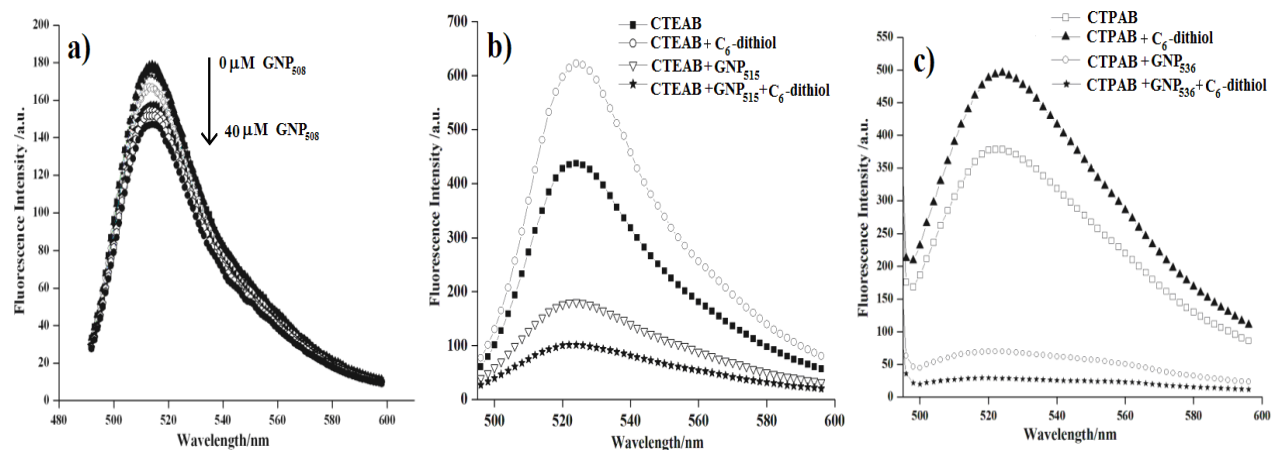

**Fig. S2** Fluorescence spectra of sodium salt of fluorescein (Na-FI) within a) water, b) CTEAB and c) CTPAB reverse micelle in presence of  $\text{C}_6$ -dithiol (100  $\mu\text{M}$ ) with varying GNP size at  $z = 6.4$ ,  $W_0 = 44$ .
